# Supplementary material for: Ionothermal synthesis of a photochromic inorganic–organic complex for colorimetric and portable UV index indication and UVB detection
Source: Royal Society of Chemistry journal article supplement (doi:10.1039/d0ra08300c), 2020-01-01
Supplement: d0ra08300c1.pdf [file d0ra08300c1.pdf]

## Supporting Information

### **Ionothermal Synthesis of Photochromic Inorganic-Organic Complex for Colorimetric and Portable UV Index Indication and UVB Detection**

**Junbiao Wu,\* Luqi Lou, Yide Han, Yan Xu, Xia Zhang, Zhuopeng Wang**

Department of Chemistry, College of Science, Northeastern University, Shenyang, Liaoning  
110819, P. R. China. E-mail: wujunbiao@mail.neu.edu.cn;

**Table S1.** Crystal data and structure refinement for NEU-20<sup>a</sup>

---

|                                                       |                                                                                |
|-------------------------------------------------------|--------------------------------------------------------------------------------|
| Empirical formula                                     | C <sub>40</sub> H <sub>28</sub> Ga <sub>2</sub> N <sub>6</sub> O <sub>20</sub> |
| Formula weight                                        | 1052.12                                                                        |
| Temperature                                           | 293 K                                                                          |
| Wavelength(Å)                                         | 0.71073                                                                        |
| Crystal system, space group                           | Monoclinic, C2/c                                                               |
| Unit cell dimensions                                  |                                                                                |
| <i>a</i> (Å)                                          | 26.47(5)                                                                       |
| <i>b</i> (Å)                                          | 10.667(19)                                                                     |
| <i>c</i> (Å)                                          | 17.28 (3)                                                                      |
| α(deg)                                                | 90                                                                             |
| β(deg)                                                | 125.389(18)                                                                    |
| γ (deg)                                               | 90                                                                             |
| Volume(Å <sup>3</sup> )                               | 3976(13)                                                                       |
| Z, calculated density(mg m <sup>-3</sup> )            | 4, 1.758                                                                       |
| Absorption coefficient(mm <sup>-1</sup> )             | 1.453                                                                          |
| <i>F</i> (000)                                        | 2128                                                                           |
| Crystal size(mm <sup>3</sup> )                        | 0.20 × 0.20 × 0.20                                                             |
| θ range(°) for data collection                        | 1.888–27.600                                                                   |
| Limiting indices                                      | -34 ≤ <i>h</i> ≤ 34, -13 ≤ <i>k</i> ≤ 13, -22 ≤ <i>l</i> ≤ 22                  |
| Reflections collected/unique                          | 17943/4593, [ <i>R</i> (int) = 0.1313]                                         |
| Completeness to θ (%)                                 | 25.242, 99.8                                                                   |
| Absorption correction                                 | semi-empirical from equivalents                                                |
| Refinement method                                     | full-matrix least-squares on <i>F</i> <sup>2</sup>                             |
| Data/restraints/parameters                            | 4593/0/307                                                                     |
| Goodness-of-fit on <i>F</i> <sup>2</sup>              | 1.085                                                                          |
| Final <i>R</i> indices [ <i>I</i> > 2 σ ( <i>I</i> )] | <i>R</i> <sub>1</sub> = 0.0890, <i>wR</i> <sub>2</sub> = 0.2226                |
| <i>R</i> indices (all data)                           | <i>R</i> <sub>1</sub> = 0.1349, <i>wR</i> <sub>2</sub> = 0.2599                |
| Largest diff. peak and hole (eÅ <sup>-3</sup> )       | 1.406 and -1.147                                                               |

---

<sup>a</sup>*R*<sub>1</sub> = Σ(Δ*F*/Σ(*F*<sub>o</sub>)), *wR*<sub>2</sub> = (Σ[w(*F*<sub>o</sub><sup>2</sup> - *F*<sub>c</sub><sup>2</sup>)]/Σ[w(*F*<sub>o</sub><sup>2</sup>)<sup>2</sup>]<sup>1/2</sup> and *w*=1/[σ<sup>2</sup>(*F*<sub>o</sub><sup>2</sup>)+(0.1151*P*)<sup>2</sup>+7.0278*P*] where *P*=(*F*<sub>o</sub><sup>2</sup>+2*F*<sub>c</sub><sup>2</sup>)/3

**Table S2.** Hydrogen bonds for NEU20 [A and deg.]

| D-H...A               | d(D-H) | d(H...A) | d(D...A)  | <(DHA) |
|-----------------------|--------|----------|-----------|--------|
| N(1)-H(1B)...O(7)#1   | 0.86   | 2.18     | 2.880(9)  | 138.7  |
| N(1)-H(1B)...O(9)#1   | 0.86   | 2.11     | 2.834(10) | 141.4  |
| C(1)-H(1A)...O(3)     | 0.93   | 2.42     | 3.348(12) | 173.9  |
| C(3)-H(3A)...O(5)#2   | 0.93   | 2.46     | 3.390(11) | 174.2  |
| C(6)-H(6A)...O(4)     | 0.93   | 2.52     | 3.158(11) | 126.3  |
| C(7)-H(7A)...O(3)     | 0.93   | 2.60     | 3.451(10) | 151.5  |
| C(8)-H(8A)...O(5)#2   | 0.93   | 2.59     | 3.456(11) | 155.0  |
| C(8)-H(8A)...O(6)#2   | 0.93   | 2.47     | 3.096(10) | 124.7  |
| C(9)-H(9A)...O(6)#2   | 0.93   | 2.63     | 3.176(11) | 118.3  |
| C(14)-H(14A)...O(7)#2 | 0.93   | 2.61     | 3.503(11) | 161.4  |
| C(15)-H(15A)...O(8)#3 | 0.93   | 2.54     | 3.209(11) | 129.4  |

**Table S3** Summary of photoresponsive rate in this work compared with literatures

| Entry | Sample name                                                                                                                        | Light source              | Changed color            | $k_{\text{obs}}$ ( $\text{s}^{-1}$ ) | Ref       |
|-------|------------------------------------------------------------------------------------------------------------------------------------|---------------------------|--------------------------|--------------------------------------|-----------|
| 1     | [Zn <sub>2</sub> (Bpy)(CTA) <sub>4</sub> ]                                                                                         | Xe lamp                   | colorless to purple      | $1.140 \times 10^{-3}$               | 1         |
| 2     | [H <sub>2</sub> CPBPY]·[H <sub>2</sub> BTEC]                                                                                       | Xe lamp                   | pale yellow to green     | $5.943 \times 10^{-4}$               | 2         |
| 3     | [Cd(CPBPY)(m-BDC)·H <sub>2</sub> O]                                                                                                | Xe lamp                   | yellow to blue           | $1.2 \times 10^{-3}$                 | 3         |
| 4     | {[Zn <sub>3</sub> (Cebpy) <sub>2</sub> (Hbtc)(H <sub>2</sub> btc) <sub>2</sub> (OH) <sub>2</sub> ]·4H <sub>2</sub> O} <sub>n</sub> | Xe lamp                   | pale yellow to dark blue | $4.29 \times 10^{-3}$                | 4         |
| 5     | [C <sub>10</sub> H <sub>10</sub> N <sub>2</sub> ][GaF(C <sub>2</sub> O <sub>4</sub> ) <sub>2</sub> ]                               | UV light or visible light | colorless to purple      | $3.86 \times 10^{-3}$                | 5         |
| 6     | NEU20                                                                                                                              | UV light                  | colorless to purple      | 0.195                                | This work |

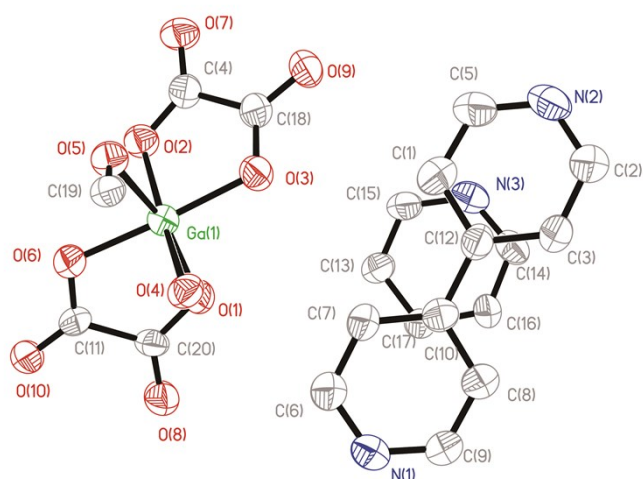

**Figure S1.** Thermal ellipsoids of NEU20 given at 50% probability, showing the atomic labelling scheme.

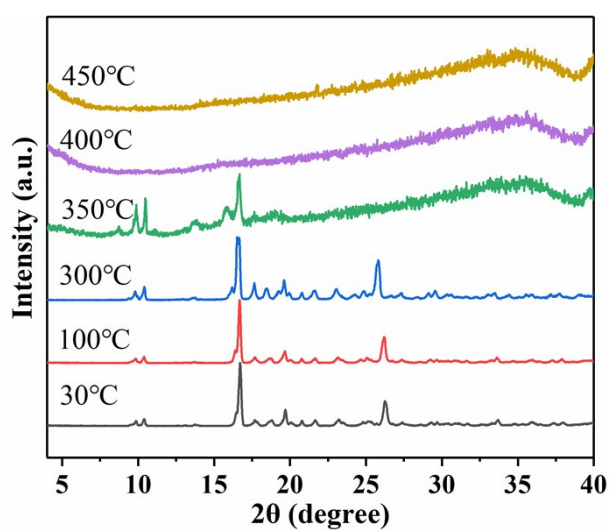

**Figure S2.** *In-situ* temperature dependent PXRD patterns of NEU-20 calcined at different temperatures.

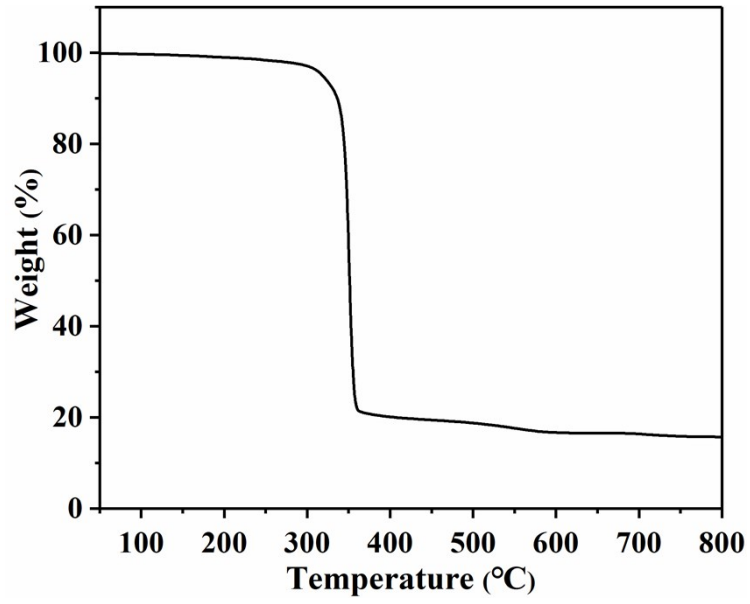

Figure S3. The thermal gravimetric curve of NEU-20.

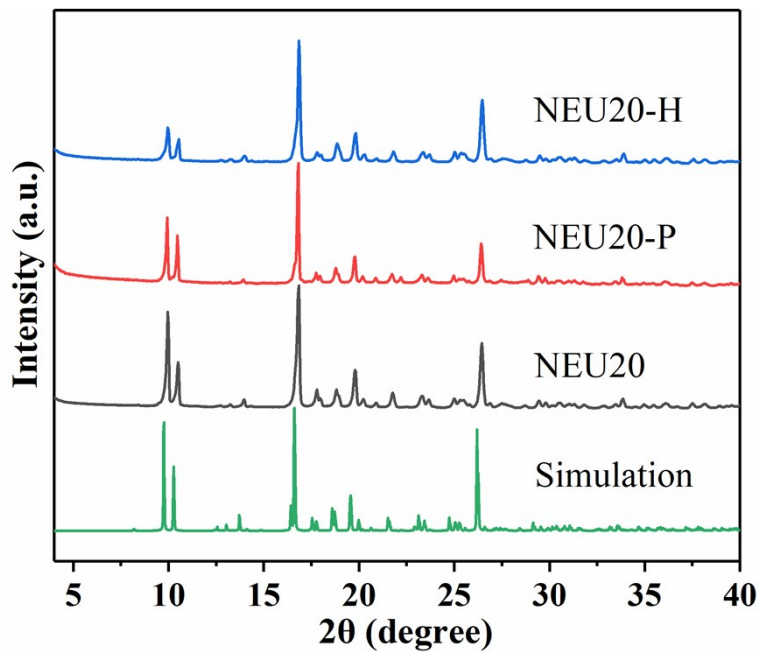

Figure S4. Experimental of NEU20, NEU20-P and NEU20-H and calculated powder XRD patterns of NEU20.

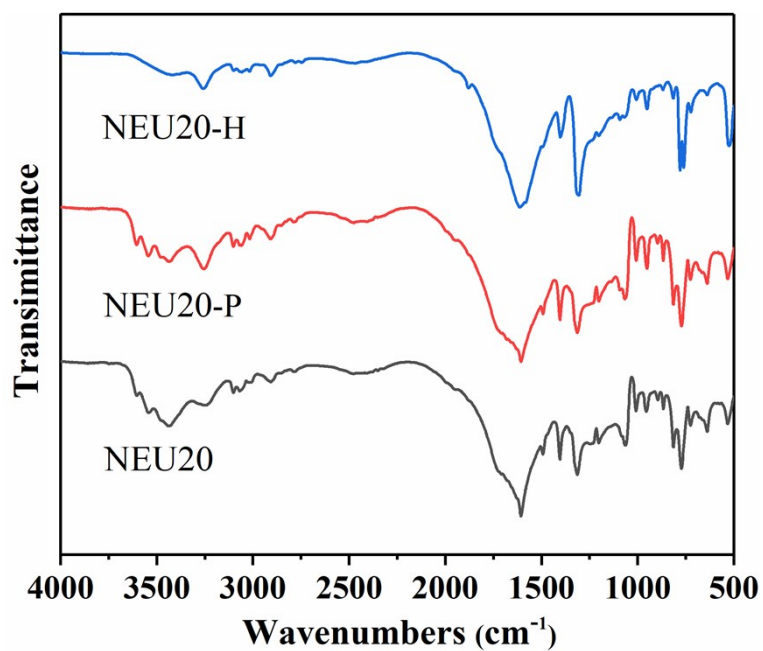

Figure S5. IR curves of NEU20, NEU20-P and NEU20-H.

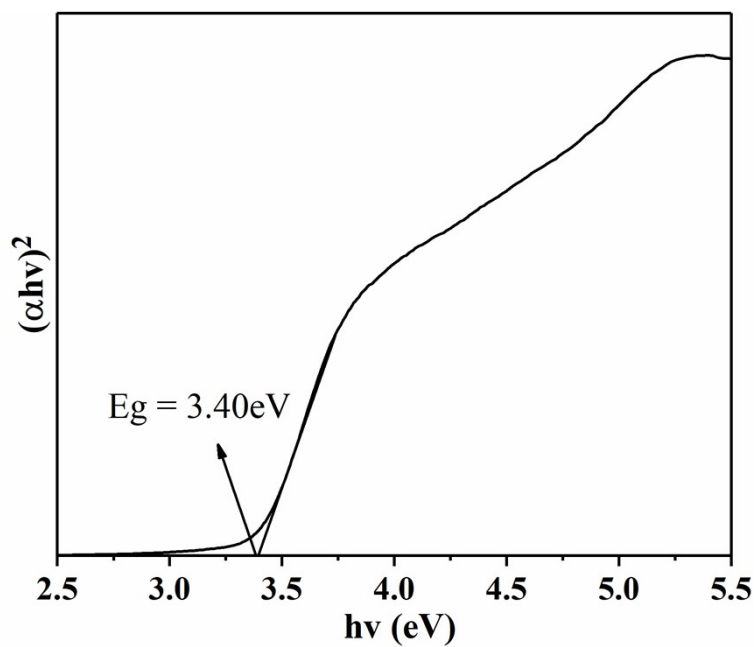

Figure S6. Plot of  $(\alpha h\nu)^2$  as a function of  $h\nu$  for the bandgap energy of NEU20.

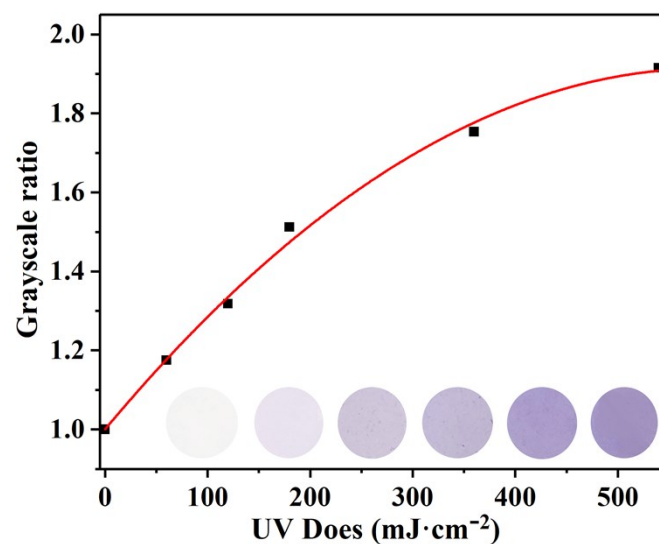

**Figure S7.** UVA doses detected plot with NEU20, following the second-order nonlinear relationship  $y=-2.645e^{-6}x^2-0.00311x+1$ ,  $R^2=0.996$ .

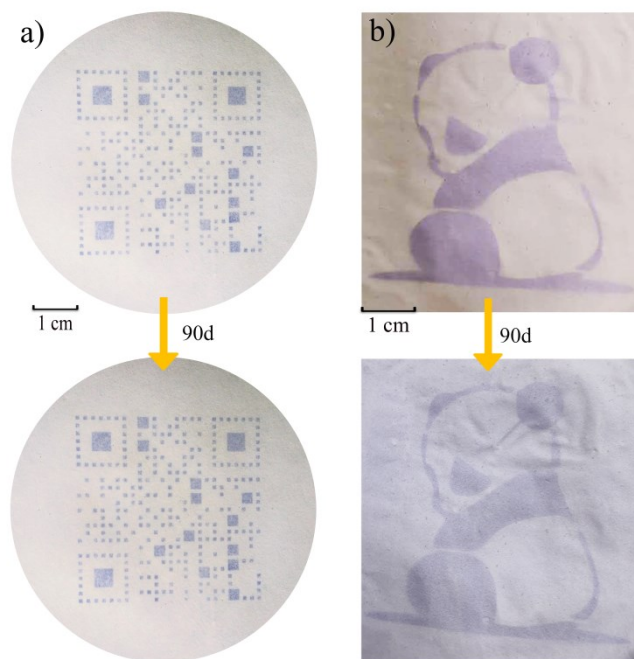

**Figure S8.** The stability test of a) NEU20 PAPER and b) NEU20/PVDF under ambient conditions for 90 days.

**Table S4** Summary of photochromic performances in this work compared with literatures

| Entry | sample name                                                                                                                                 | Light sources                   | Irradiation intensity | Response time      | Color transformation        | Bleach condition          | Ref |
|-------|---------------------------------------------------------------------------------------------------------------------------------------------|---------------------------------|-----------------------|--------------------|-----------------------------|---------------------------|-----|
| 1     | [Zn <sub>2</sub> (Bpy)(CTA) <sub>4</sub> ]                                                                                                  | Xe lamp                         | 300W                  | -                  | colorless to purple         | 130°C for 2h in air.      | 1   |
| 2     | [H <sub>2</sub> CPBPY]·[H <sub>2</sub> BT<br>EC]                                                                                            | Xe lamp                         | 150 W                 | -                  | pale yellow to green        | 130°C in air.             | 2   |
| 3     | [Cd(CPBPY)(m-<br>BDC)·H <sub>2</sub> O                                                                                                      | Xe lamp                         | -                     | -                  | yellow to blue              | 120°C                     | 3   |
| 4     | {[Zn <sub>3</sub> (Cebpy) <sub>2</sub> (Hbtc)<br>(H <sub>2</sub> btc) <sub>2</sub> (OH) <sub>2</sub> ]·4H <sub>2</sub><br>O} <sub>n</sub>   | Xe lamp                         | -                     | 10min<br>saturated | pale yellow to dark blue    | 80°C for 2 hours.         | 4   |
| 5     | [C <sub>10</sub> H <sub>10</sub> N <sub>2</sub> ][GaF(C <sub>2</sub> O<br>4) <sub>2</sub> ]                                                 | UV light<br>or visible<br>light | 48W<br>300W           | 10s                | colorless to purple         | 110°C for 30 min.         | 5   |
| 6     | [C <sub>12</sub> H <sub>14</sub> N <sub>2</sub> ][Zn <sub>6</sub> (PO <sub>4</sub><br>4(HPO <sub>4</sub> )(H <sub>2</sub> O) <sub>2</sub> ] | UV light                        | -                     | several<br>hours   | colorless to blue           | 230°C for 1 h in air.     | 6   |
| 7     | [Cd(CEbpy)(m-<br>BDC)(DMF)]·2H <sub>2</sub> O                                                                                               | UV light                        | 175W                  | 2min               | yellow to darker blue       | 140°C for ~ 6 h .         | 7   |
| 8     | [Zn(HPO <sub>3</sub> )(4,4'-<br>bipy) <sub>0.5</sub> ]                                                                                      | Xe lamp                         | 300W                  | >3min              | colorless to pink           | 145°C for 2 hours in air. | 8   |
| 9     | [Zn(bc bpy) <sub>0.5</sub> (pma) <sub>0.5</sub> (H <sub>2</sub> O) <sub>3</sub> ]                                                           | UV light                        | 300W                  | 5s                 | colorless to blue           | 50°C for 20 min in air.   | 9   |
| 10    | (MV)Bi <sub>2</sub> Cl <sub>8</sub>                                                                                                         | UV light                        | -                     | -                  | Yellow to black             | 130°C in air              | 10  |
| 11    | [Cd <sub>1.5</sub> (H <sub>2</sub> L) <sub>0.5</sub> (Cl) <sub>3</sub> (<br>CH <sub>3</sub> OH)] <sub>n</sub>                               | Xe lamp                         | 300W                  | a few<br>minutes   | pale yellow to blue         | 120°C for 20 min in air.  | 11  |
| 12    | [Mg <sub>2</sub> (1,4-<br>NDC) <sub>2</sub> (H <sub>2</sub> O) <sub>2</sub> ](bpy)(<br>H <sub>2</sub> O) <sub>4</sub>                       | Xe lamp                         | 500W                  | 10min              | colourless to blue          | 60°C for 20 min.          | 12  |
| 13    | [Zn(HCOO) <sub>2</sub> (4,4'-<br>bipy)]                                                                                                     | Xe lamp                         | 300 W                 | -                  | pale yellow to olive green  | 120°C for 2h.             | 13  |
| 14    | Eu <sub>2</sub> (m-BDC) <sub>4</sub> (MV)                                                                                                   | Xe lamp<br>or<br>sunlight       | -                     | -                  | brown to green              | -                         | 14  |
| 15    | TbMOF                                                                                                                                       | Xe lamp                         | 300 W                 | -                  | bright yellow to dark green | 120°C for 1h in air.      | 15  |
| 16    | (hMV)[Bi(hMV)Cl <sub>5</sub><br>]                                                                                                           | Hg UV<br>lamp                   | 150 W                 | a few<br>minutes   | white to blue               | 120°C for few minutes.    | 16  |
| 17    | [Cd(CPBPY)(o-                                                                                                                               | UV light                        | -                     | -                  | yellow to gray              | exposed to                | 17  |



|    |                                                                                          |                        |       |     |                              |                                                  |              |
|----|------------------------------------------------------------------------------------------|------------------------|-------|-----|------------------------------|--------------------------------------------------|--------------|
|    | BDC)(H <sub>2</sub> O)]·H <sub>2</sub> O                                                 |                        |       |     |                              | pure O <sub>2</sub> or<br>air, return<br>slowly. |              |
| 18 | [Zn(L <sub>1</sub> )(L <sub>3</sub> ) <sub>0.5</sub> ]-H <sub>2</sub> O                  | Xe lamp                | 250 W | 20s | pale yellow to<br>pale green | 130 °C for 5<br>min.                             | 18           |
| 19 | NTHU-9                                                                                   | X-rays                 | -     | -   | orange to slate<br>gray      | 200°C for<br>12h in air.                         | 19           |
| 20 | [H <sub>2</sub> (Bpy)][H <sub>3</sub> (Pma)]<br>2                                        | Xe lamp                | 300 W | -   | yellow to<br>grayish purple  | 80 °C for 3<br>min.                              | 20           |
| 21 | [Cd <sub>2</sub> (ic)(mc)(4,4'-<br>bipy) <sub>3</sub> ] <sub>n</sub> ·4nH <sub>2</sub> O | light with<br>λ<460 nm | -     | -   | yellow to blue               | 80°C for<br>several<br>hours.                    | 21           |
| 22 | NEU20                                                                                    | UV light               | 30W   | 2s  | colorless to<br>purple       | 140°C for<br>10 min                              | This<br>work |

#### References:

- 1 J. Liu, P. X. Li, H. Y. Zeng and G. C. Guo, *RSC Adv.*, 2017, **7**, 34901.
- 2 H. J. Chen, M. Li, G. M. Zheng, Z. Y. Fu and J. C. Dai, *RSC Adv.*, 2014, **4**, 42983.
- 3 Y. Tan, Z. Y. Fu, Y. Zeng, J. Zhang and J. C. Dai, *J. Mater. Chem.*, 2012, **22**, 17452.
- 4 Q. Shi, S. Yu Wu, X. T. Qiu, Y. Q. Sun and S. T. Zheng, *Dalton Trans.*, 2019, **48**, 954.
- 5 J. Wu, L. Lou, H. Sun, C. Tao, T. Li, Z. Wang, X. Zhang and J. Li, *CrystEngComm.*, 2020, **22**, 1078.
- 6 J. B. Wu, Y. Yan, J. Y. Li and J. H. Yu, *Chem. Commun.*, 2013, **49**, 4995.
- 7 J. J. Liu, J. Li and W. B. Lu, *RSC. Adv.*, 2019, **9**, 33155.
- 8 B. D. Ge, Y. Han, S. D. Han and G. M. Wang, *Inorg. Chem. Front.*, 2019, **6**, 2435.
- 9 L. Li, Z. M. Tu, Y. Hua and H. Zhang, *Inorg. Chem. Front.*, 2019, **6**, 3077.
- 10 G. Xu, G. C. Guo, M. S. Wang and J. S. Huang, *Angew. Chem.*, 2007, **119**, 3313.
- 11 L. K. Li, H. Y. Li, T. Li, F. A. Li and S. Q. Zang, *CrystEngComm.*, 2018, **20**, 6412.
- 12 Z. F. Wu, B. Tan, Z. L. Xie and X. Y. Huang, *J. Mater. Chem. C.*, 2016, **4**, 2438.
- 13 C. J. Zhang, Z. Wei. Chen, M. S. Wang and G. C. Guo, *Inorg. Chem.*, 2014, **53**, 847.
- 14 H. J. Chen, G. M. Zheng, M. Li and Z. Y. Fu, *Chem. Commun.*, 2014, **50**, 13544.
- 15 H. Y. Li, Y. L. Wei, S. Q. Zang and Thomas C. W. Mak, *Chem. Mater.*, 2015, **27**,

1327.

- 16 Oksana Toma, Nicolas Mercier, and Chiara Botta, *Eur. J. Inorg. Chem.*, 2013, **7**, 1113.
- 17 S. L. Li, M. Han, B. Wu, and X. M. Zha, *Cryst. Growth Des.*, 2018, **18**, 3883.
- 18 W. Q. Kan, S. Z. Wen, Y. C. He and C. Y. Xu, *Inorg. Chem.*, 2017, **56**, 14926.
- 19 P.C. Jhang, N.T. Chuang and S.L. Wang, *Angew. Chem. Int. Ed.*, 2010, **122**, 4296.
- 20 Z.W. Chen, G. Lu, P.X. Li, R.G. Lin, L.Z. Cai, M.S. Wang and G.C. Guo, *Cryst. Growth Des.*, 2014, **14**, 2527.
- 21 M. S. Wang, G. C. Guo, G. Xu and J. S. Huang, *Angew. Chem.*, 2008, **120**, 3621.
